# Supplementary material for: Volatilome changes during probiotic fermentation of combined soy and rice drinks
Source: Royal Society of Chemistry journal article supplement (doi:10.1039/d0fo03337e), 2021-01-01
Supplement: d0fo03337e1.pdf [file d0fo03337e1.pdf]

**Figure S1.** Heatmap of relative quantification of means of VOCs of samples. Acid 1 = dihydroxymaleic acid; Acid 2 = 1-butaneboronic acid; Acid 3 = acetic acid; Acid 4 = 5-aminovaleric acid; Acid 5 = propanoic acid; Acid 6 = butanoic acid; Acid 7 = propanoic acid,3-hydroxy; Acid 8 = hexanoic acid; Acid 9 = heptanoic acid; Acid 10 = octanoic acid; Acid 11 = nonanoic acid; Acid 12 = oxalic acid dodecyl ester; Alcohol 1 = 2-decanol; Alcohol 2 = 2-propyl,1-pentanol; Alcohol 3 = pentanol,5-amino; Alcohol 4 = 2-hexanol; Alcohol 5 = 3-heptanol; Alcohol 6 = 1-pentanol; Alcohol 7 = 2-hexadecanol; Alcohol 8 = nonanol-5-ethyl; Alcohol 9 = 1-hexanol; Alcohol 10 = 2,4,4-trimethyl-1-pentanol; Alcohol 11 = 1-octen-3-ol; Alcohol 12 = heptanol; Alcohol 13 = 1-hexanol,2-ethyl; Alcohol 14 = 3-tridecanol; Alcohol 15 = 2-hexanol,2,3-dimethyl; Alcohol 16 = 1-octanol; Alcohol 17 = 2-dodecanol; Alcohol 18 = 2-octen-1-ol,(E); Alcohol 19 = 1-nonanol; Alcohol 20 = ethyl alcohol; Aldehyde 1 = butanal,3-methyl; Aldehyde 2 = hexanal; Aldehyde 3 = 2-butenal,3-methyl; Aldehyde 4 = heptanal; Aldehyde 5 = octanal; Aldehyde 6 = 2-heptenal,(Z); Aldehyde 7 = nonanal; Aldehyde 8 = furfural; Aldehyde 9 = decanal; Aldehyde 10 = hexanal,5-methyl; Aldehyde 11 = 2,4-heptadienal,(E,E); Aldehyde 12 = benzaldehyde; Alkane 1 = furan,2-methyl; Alkane 2 = furan,2-pentyl; Alkane 3 = decane; Alkane 4 = heptane,2,4-dimethyl; Alkane 5 = dodecane,1-fluoro; Alkane 6 = decane-3,6-dimethyl; Alkane 7 = nonane; Alkane 8 = octane,2,6-dimethyl; Alkene 1 = 2-octene,(Z); Alkene 2 = 2-pentene,1-butoxy; Alkene 3 = 1-pentene,2,4,4-trimethyl; Alkene 4 = 1-pentadecene; Alkene 5 = 2-pentene,3-ethyl-2-methyl; Amine 1 = 6-azathymine; Amine 2 = 2-formylhistamine; Amine 3 = acetamide,2-(2-hydroxyethoxy); Ketone 1 = acetone; Ketone 2 = 2-butanone; Ketone 3 = 2-pentanone; Ketone 4 = 3-nonanone,2-methyl; Ketone 5 = 2-butanone,3-hydroxy; Ketone 6 = 6-dodecanone; Ketone 7 = 7-pentadecanone; Ketone 8 = 3-hexanone,5-methyl; Ketone 9 = 2-hexanone,4-methyl; Ketone 10 = 3-penten-2-one,4-methyl; Ketone 11 = 4-heptanone,2,6-dimethyl; Ketone 12 = 2-heptanone,4-methyl; Ketone 13 = 11-dodecen-2-one; Ketone 14 = 2-nonanone; Ketone 15 = 1-propanone,1-cyclohexyl; Ketone 16 = 3,5-dimethyl-2-furyl methyl ketone.
