# Supplementary material for: Volatilome changes during probiotic fermentation of combined soy and rice drinks
Source: Royal Society of Chemistry journal article supplement (doi:10.1039/d0fo03337e), 2021-01-01
Supplement: d0fo03337e4.pdf [file d0fo03337e4.pdf]

Figure S2. MANOVA with categorical predictors to weight the contribution of bacterial strains or drink formulations in VOCs generation. A = MANOVA of alcohols categorized for the matrix ( $P < 0.001$ ); B = MANOVA of alcohols categorized for the strains ( $P < 0.01$ ); c = MANOVA of aldehydes categorized for the matrix ( $P < 0.05$ ); D = MANOVA of aldehydes categorized for the strains ( $P < 0.01$ ); E = MANOVA of ketones categorized for the matrix ( $P < 0.05$ ); F = MANOVA of ketones categorized for the strains ( $P < 0.001$ ); G = MANOVA of organic acids categorized for the matrix ( $P < 0.05$ ); H = MANOVA of organic acids categorized for the strains ( $P < 0.01$ ).
