# Supplementary material for: Volatilome changes during probiotic fermentation of combined soy and rice drinks
Source: Royal Society of Chemistry journal article supplement (doi:10.1039/d0fo03337e), 2021-01-01
Supplement: d0fo03337e6.pdf [file d0fo03337e6.pdf]

Supplementary Table 1. Descriptions of codes of samples.

| Sample | Description                                                                                                |
|--------|------------------------------------------------------------------------------------------------------------|
| Slh    | Soy drink* fermented with 7 Log <sub>10</sub> cells/mL load of <i>Lactobacillus helveticus</i> CBNL (lh)   |
| Slr    | Soy drink fermented with 7 Log <sub>10</sub> cells/mL load of <i>L. rhamnosus</i> C243 (lr)                |
| Sbb    | Soy drink fermented with 7 Log <sub>10</sub> cells/mL load of <i>Bifidobacterium bifidum</i> B700795 (bb)  |
| Sm1    | Soy drink fermented with 7 Log <sub>10</sub> cells/mL load of a mix equally containing lh, lr, and bb (m1) |
| Sbl    | Soy drink fermented with 7 Log <sub>10</sub> cells/mL of <i>B. longum</i> BI12 (bl)                        |
| Sm2    | Soy drink fermented with 7 Log <sub>10</sub> cells/mL of a mix equally containing lh, lr, bb, and bl (m2)  |
| Rlh    | Rice drink** fermented with 7 Log <sub>10</sub> cells/mL load of lh                                        |
| Rlr    | Rice drink fermented with 7 Log <sub>10</sub> cells/mL load of lr                                          |
| Rbb    | Rice drink fermented with 57 Log <sub>10</sub> cells/mL load of bb                                         |
| Rm1    | Rice drink fermented with 7 Log <sub>10</sub> cells/mL load of m1                                          |
| Rbl    | Rice drink fermented with 7 Log <sub>10</sub> cells/mL load of bl                                          |
| Rm2    | Rice drink fermented with 7 Log <sub>10</sub> cells/mL load of m2                                          |
| SR25lh | Soy/Rice (25/75 % v/v) drink fermented with 7 Log <sub>10</sub> cells/mL load of lh                        |
| SR25lr | Soy/Rice (25/75 % v/v) drink fermented with 7 Log <sub>10</sub> cells/mL load of lr                        |
| SR25bb | Soy/Rice (25/75 % v/v) drink fermented with 7 Log <sub>10</sub> cells/mL load of bb                        |
| SR25m1 | Soy/Rice (25/75 % v/v) drink fermented with 7 Log <sub>10</sub> cells/mL load of m1                        |
| SR25bl | Soy/Rice (25/75 % v/v) drink fermented with 7 Log <sub>10</sub> cells/mL load of bl                        |
| SR25m2 | Soy/Rice (25/75 % v/v) drink fermented with 7 Log <sub>10</sub> cells/mL load of m2                        |
| SR50lh | Soy/Rice (50/75 % v/v) drink fermented with 7 Log <sub>10</sub> cells/mL load of lh                        |
| SR50lr | Soy/Rice (50/75 % v/v) drink fermented with 7 Log <sub>10</sub> cells/mL load of lr                        |
| SR50bb | Soy/Rice (50/75 % v/v) drink fermented with 7 Log <sub>10</sub> cells/mL load of bb                        |
| SR50m1 | Soy/Rice (50/75 % v/v) drink fermented with 7 Log <sub>10</sub> cells/mL load of m1                        |
| SR50bl | Soy/Rice (50/75 % v/v) drink fermented with 7 Log <sub>10</sub> cells/mL load of bl                        |
| SR50m2 | Soy/Rice (50/75 % v/v) drink fermented with 7 Log <sub>10</sub> cells/mL load of m2                        |
| SR75lh | Soy/Rice (75/25 % v/v) drink fermented with 7 Log <sub>10</sub> cells/mL load of lh                        |
| SR75lr | Soy/Rice (75/25 % v/v) drink fermented with 7 Log <sub>10</sub> cells/mL load of lr                        |
| SR75bb | Soy/Rice (75/25 % v/v) drink fermented with 7 Log <sub>10</sub> cells/mL load of bb                        |
| SR75m1 | Soy/Rice (75/25 % v/v) drink fermented with 7 Log <sub>10</sub> cells/mL load of m1                        |
| SR75bl | Soy/Rice (75/25 % v/v) drink fermented with 7 Log <sub>10</sub> cells/mL load of bl                        |
| SR75m2 | Soy/Rice (75/25 % v/v) drink fermented with 7 Log <sub>10</sub> cells/mL load of m2                        |

\* and \*\* indicates commercial products from Alinor, Ripalta Cremasca, Italy

Supplementary Table 2. Quantification means of bacterial cells during fermentation of drinks.

| Sample | Log <sub>10</sub> cells/mL |                     |      |                     |       |                     | Delta Log <sub>10</sub> cells/mL |                      |      |                      |
|--------|----------------------------|---------------------|------|---------------------|-------|---------------------|----------------------------------|----------------------|------|----------------------|
|        | 0 h                        |                     | 6 h  |                     | 24 h  |                     | 6 h                              |                      | 24 h |                      |
| Slh    | 7.12                       | ± 0.14 <sup>d</sup> | 8.45 | ± 0.29 <sup>c</sup> | 9.87  | ± 0.23 <sup>a</sup> | 1.33                             | ± 0.13 <sup>†</sup>  | 2.75 | ± 0.36 <sup>†</sup>  |
| Slr    | 7.14                       | ± 0.18 <sup>d</sup> | 8.71 | ± 0.32 <sup>c</sup> | 9.33  | ± 0.31 <sup>b</sup> | 1.57                             | ± 0.11 <sup>†</sup>  | 2.19 | ± 0.19 <sup>††</sup> |
| Sbb    | 7.04                       | ± 0.11 <sup>d</sup> | 8.61 | ± 0.24 <sup>c</sup> | 9.63  | ± 0.36 <sup>b</sup> | 1.57                             | ± 0.13 <sup>**</sup> | 2.59 | ± 0.12 <sup>†</sup>  |
| Sm1    | 7.10                       | ± 0.27 <sup>d</sup> | 8.89 | ± 0.21 <sup>c</sup> | 10.20 | ± 0.32 <sup>a</sup> | 1.79                             | ± 0.11 <sup>**</sup> | 3.10 | ± 0.13 <sup>††</sup> |
| Sbl    | 7.09                       | ± 0.09 <sup>d</sup> | 8.30 | ± 0.25 <sup>c</sup> | 9.19  | ± 0.21 <sup>b</sup> | 1.21                             | ± 0.20 <sup>**</sup> | 2.10 | ± 0.26 <sup>†</sup>  |
| Sm2    | 7.14                       | ± 0.22 <sup>d</sup> | 8.51 | ± 0.18 <sup>c</sup> | 10.11 | ± 0.24 <sup>a</sup> | 1.37                             | ± 0.15 <sup>**</sup> | 2.97 | ± 0.38 <sup>††</sup> |
| Rlh    | 7.17                       | ± 0.14 <sup>d</sup> | 7.98 | ± 0.19 <sup>a</sup> | 9.16  | ± 0.26 <sup>b</sup> | 0.81                             | ± 0.09 <sup>*</sup>  | 1.99 | ± 0.24 <sup>†</sup>  |
| Rlr    | 7.30                       | ± 0.25 <sup>d</sup> | 8.20 | ± 0.23 <sup>c</sup> | 9.11  | ± 0.20 <sup>b</sup> | 0.90                             | ± 0.06 <sup>**</sup> | 1.81 | ± 0.14 <sup>**</sup> |
| Rbb    | 7.28                       | ± 0.07 <sup>d</sup> | 7.82 | ± 0.19 <sup>a</sup> | 9.83  | ± 0.22 <sup>a</sup> | 0.54                             | ± 0.12 <sup>*</sup>  | 2.55 | ± 0.10 <sup>†</sup>  |
| Rm1    | 7.32                       | ± 0.17 <sup>d</sup> | 7.97 | ± 0.15 <sup>a</sup> | 9.77  | ± 0.18 <sup>b</sup> | 0.65                             | ± 0.18 <sup>*</sup>  | 2.45 | ± 0.12 <sup>†</sup>  |
| Rbl    | 7.25                       | ± 0.21 <sup>d</sup> | 8.54 | ± 0.22 <sup>c</sup> | 10.05 | ± 0.28 <sup>a</sup> | 1.29                             | ± 0.21 <sup>**</sup> | 2.80 | ± 0.16 <sup>†</sup>  |
| Rm2    | 7.13                       | ± 0.32 <sup>d</sup> | 8.14 | ± 0.30 <sup>c</sup> | 9.97  | ± 0.22 <sup>a</sup> | 1.01                             | ± 0.22 <sup>**</sup> | 2.84 | ± 0.23 <sup>†</sup>  |
| SR25lh | 7.03                       | ± 0.14 <sup>d</sup> | 9.15 | ± 0.22 <sup>b</sup> | 9.62  | ± 0.19 <sup>b</sup> | 2.12                             | ± 0.11 <sup>†</sup>  | 2.59 | ± 0.21 <sup>†</sup>  |
| SR25lr | 7.05                       | ± 0.23 <sup>d</sup> | 9.88 | ± 0.15 <sup>a</sup> | 9.68  | ± 0.21 <sup>b</sup> | 2.83                             | ± 0.12 <sup>†</sup>  | 2.63 | ± 0.34 <sup>†</sup>  |
| SR25bb | 6.98                       | ± 0.13 <sup>d</sup> | 8.48 | ± 0.26 <sup>c</sup> | 10.17 | ± 0.24 <sup>a</sup> | 1.50                             | ± 0.12 <sup>**</sup> | 3.19 | ± 0.23 <sup>††</sup> |
| SR25m1 | 6.97                       | ± 0.20 <sup>d</sup> | 9.04 | ± 0.15 <sup>c</sup> | 9.86  | ± 0.14 <sup>a</sup> | 2.07                             | ± 0.18 <sup>†</sup>  | 2.89 | ± 0.28 <sup>†</sup>  |
| SR25bl | 7.02                       | ± 0.12 <sup>d</sup> | 9.28 | ± 0.17 <sup>b</sup> | 9.45  | ± 0.15 <sup>b</sup> | 2.26                             | ± 0.15 <sup>†</sup>  | 2.43 | ± 0.25 <sup>†</sup>  |
| SR25m2 | 7.08                       | ± 0.25 <sup>d</sup> | 9.45 | ± 0.18 <sup>b</sup> | 9.88  | ± 0.16 <sup>a</sup> | 2.37                             | ± 0.08 <sup>†</sup>  | 2.82 | ± 0.31 <sup>†</sup>  |
| SR50lh | 7.01                       | ± 0.12 <sup>d</sup> | 9.65 | ± 0.14 <sup>b</sup> | 10.09 | ± 0.21 <sup>a</sup> | 2.64                             | ± 0.08 <sup>†</sup>  | 3.08 | ± 0.32 <sup>††</sup> |
| SR50lr | 6.95                       | ± 0.16 <sup>d</sup> | 9.34 | ± 0.07 <sup>b</sup> | 9.71  | ± 0.22 <sup>b</sup> | 2.39                             | ± 0.15 <sup>**</sup> | 2.76 | ± 0.13 <sup>†</sup>  |
| SR50bb | 7.13                       | ± 0.19 <sup>d</sup> | 8.30 | ± 0.22 <sup>c</sup> | 10.18 | ± 0.29 <sup>a</sup> | 1.17                             | ± 0.09 <sup>**</sup> | 3.05 | ± 0.08 <sup>††</sup> |
| SR50m1 | 7.07                       | ± 0.11 <sup>d</sup> | 9.36 | ± 0.31 <sup>b</sup> | 10.15 | ± 0.14 <sup>a</sup> | 2.29                             | ± 0.13 <sup>**</sup> | 3.08 | ± 0.19 <sup>††</sup> |
| SR50bl | 6.97                       | ± 0.13 <sup>d</sup> | 9.83 | ± 0.30 <sup>a</sup> | 10.03 | ± 0.13 <sup>a</sup> | 2.86                             | ± 0.19 <sup>†</sup>  | 3.06 | ± 0.20 <sup>††</sup> |
| SR50m2 | 7.17                       | ± 0.17 <sup>d</sup> | 9.87 | ± 0.12 <sup>a</sup> | 9.98  | ± 0.31 <sup>a</sup> | 2.70                             | ± 0.11 <sup>**</sup> | 2.81 | ± 0.19 <sup>†</sup>  |
| SR75lh | 7.09                       | ± 0.12 <sup>d</sup> | 9.84 | ± 0.22 <sup>a</sup> | 10.03 | ± 0.18 <sup>a</sup> | 2.75                             | ± 0.27 <sup>†</sup>  | 2.94 | ± 0.16 <sup>†</sup>  |
| SR75lr | 6.98                       | ± 0.19 <sup>d</sup> | 9.43 | ± 0.32 <sup>b</sup> | 9.97  | ± 0.09 <sup>a</sup> | 2.45                             | ± 0.22 <sup>**</sup> | 2.99 | ± 0.28 <sup>††</sup> |
| SR75bb | 6.96                       | ± 0.18 <sup>d</sup> | 8.30 | ± 0.10 <sup>c</sup> | 10.33 | ± 0.23 <sup>a</sup> | 1.34                             | ± 0.07 <sup>*</sup>  | 3.37 | ± 0.23 <sup>††</sup> |
| SR75m1 | 7.13                       | ± 0.28 <sup>d</sup> | 9.36 | ± 0.22 <sup>b</sup> | 10.37 | ± 0.35 <sup>a</sup> | 2.23                             | ± 0.10 <sup>**</sup> | 3.24 | ± 0.32 <sup>††</sup> |
| SR75bl | 7.04                       | ± 0.17 <sup>d</sup> | 9.85 | ± 0.11 <sup>a</sup> | 9.90  | ± 0.17 <sup>a</sup> | 2.81                             | ± 0.22 <sup>†</sup>  | 2.86 | ± 0.27 <sup>†</sup>  |
| SR75m2 | 7.11                       | ± 0.12 <sup>d</sup> | 9.11 | ± 0.12 <sup>b</sup> | 10.05 | ± 0.27 <sup>a</sup> | 2.03                             | ± 0.18 <sup>**</sup> | 2.94 | ± 0.16 <sup>†</sup>  |

Different letters (for time points values) or symbols (for delta values) indicate significant differences by Tukey's HSD (honestly significant difference) test ( $P < 0.05$ ).

Supplementary Table 3. pH means value of drinks during fermentation

| Sample | pH   |                     |      |                     |      |                     | Delta pH                  |                           |
|--------|------|---------------------|------|---------------------|------|---------------------|---------------------------|---------------------------|
|        | 0 h  |                     | 6 h  |                     | 24 h |                     | 6 h                       | 24 h                      |
| Slh    | 7.14 | ± 0.04 <sup>a</sup> | 5.15 | ± 0.19 <sup>b</sup> | 4.27 | ± 0.09 <sup>b</sup> | 1.99 ± 0.11 <sup>†</sup>  | 2.87 ± 0.06 <sup>†</sup>  |
| Slr    | 7.10 | ± 0.07 <sup>a</sup> | 5.30 | ± 0.21 <sup>b</sup> | 4.13 | ± 0.11 <sup>b</sup> | 1.80 ± 0.14 <sup>†</sup>  | 2.97 ± 0.09 <sup>††</sup> |
| Sbb    | 7.04 | ± 0.11 <sup>a</sup> | 6.01 | ± 0.14 <sup>a</sup> | 4.21 | ± 0.16 <sup>b</sup> | 1.03 ± 0.13 <sup>**</sup> | 2.83 ± 0.14 <sup>†</sup>  |
| Sm1    | 7.10 | ± 0.19 <sup>a</sup> | 5.49 | ± 0.18 <sup>a</sup> | 4.20 | ± 0.12 <sup>b</sup> | 1.61 ± 0.18 <sup>**</sup> | 2.90 ± 0.15 <sup>††</sup> |
| Sbl    | 7.09 | ± 0.31 <sup>a</sup> | 5.92 | ± 0.18 <sup>a</sup> | 3.99 | ± 0.22 <sup>c</sup> | 1.17 ± 0.24 <sup>**</sup> | 3.10 ± 0.26 <sup>††</sup> |
| Sm2    | 7.14 | ± 0.52 <sup>a</sup> | 5.60 | ± 0.18 <sup>a</sup> | 4.15 | ± 0.14 <sup>b</sup> | 1.54 ± 0.35 <sup>**</sup> | 2.99 ± 0.33 <sup>††</sup> |
| Rlh    | 7.27 | ± 0.03 <sup>a</sup> | 4.88 | ± 0.16 <sup>b</sup> | 3.01 | ± 0.06 <sup>d</sup> | 2.39 ± 0.09 <sup>†</sup>  | 4.26 ± 0.04 <sup>††</sup> |
| Rlr    | 7.30 | ± 0.05 <sup>a</sup> | 5.10 | ± 0.27 <sup>b</sup> | 3.16 | ± 0.23 <sup>d</sup> | 2.20 ± 0.16               | 4.14 ± 0.14 <sup>††</sup> |
| Rbb    | 7.28 | ± 0.08 <sup>a</sup> | 5.52 | ± 0.16 <sup>a</sup> | 3.63 | ± 0.12 <sup>c</sup> | 1.76 ± 0.12 <sup>**</sup> | 3.65 ± 0.10 <sup>††</sup> |
| Rm1    | 7.32 | ± 0.14 <sup>a</sup> | 5.17 | ± 0.20 <sup>b</sup> | 3.27 | ± 0.14 <sup>c</sup> | 2.15 ± 0.17 <sup>†</sup>  | 4.05 ± 0.14 <sup>††</sup> |
| Rbl    | 7.25 | ± 0.24 <sup>a</sup> | 5.44 | ± 0.19 <sup>b</sup> | 3.69 | ± 0.08 <sup>c</sup> | 1.81 ± 0.21 <sup>†</sup>  | 3.56 ± 0.16 <sup>††</sup> |
| Rm2    | 7.32 | ± 0.39 <sup>a</sup> | 5.24 | ± 0.19 <sup>b</sup> | 3.37 | ± 0.12 <sup>c</sup> | 2.09 ± 0.29 <sup>†</sup>  | 3.95 ± 0.26 <sup>††</sup> |
| SR25lh | 6.93 | ± 0.21 <sup>a</sup> | 4.28 | ± 0.02 <sup>b</sup> | 3.71 | ± 0.11 <sup>c</sup> | 2.65 ± 0.11 <sup>†</sup>  | 3.22 ± 0.11 <sup>††</sup> |
| SR25lr | 6.95 | ± 0.31 <sup>a</sup> | 5.45 | ± 0.01 <sup>b</sup> | 4.06 | ± 0.01 <sup>c</sup> | 1.50 ± 0.16 <sup>**</sup> | 2.89 ± 0.16 <sup>†</sup>  |
| SR25bb | 6.97 | ± 0.02 <sup>a</sup> | 6.84 | ± 0.02 <sup>a</sup> | 3.87 | ± 0.01 <sup>c</sup> | 0.13 ± 0.02 <sup>*</sup>  | 3.10 ± 0.01 <sup>††</sup> |
| SR25m1 | 6.95 | ± 0.21 <sup>a</sup> | 5.72 | ± 0.05 <sup>a</sup> | 3.74 | ± 0.05 <sup>c</sup> | 1.23 ± 0.13 <sup>**</sup> | 3.21 ± 0.11 <sup>††</sup> |
| SR25bl | 6.98 | ± 0.09 <sup>a</sup> | 4.73 | ± 0.02 <sup>b</sup> | 3.73 | ± 0.01 <sup>c</sup> | 2.25 ± 0.05 <sup>†</sup>  | 3.25 ± 0.05 <sup>††</sup> |
| SR25m2 | 6.98 | ± 0.02 <sup>a</sup> | 5.03 | ± 0.03 <sup>b</sup> | 3.71 | ± 0.04 <sup>c</sup> | 1.95 ± 0.02 <sup>†</sup>  | 3.27 ± 0.01 <sup>††</sup> |
| SR50lh | 6.91 | ± 0.04 <sup>a</sup> | 4.51 | ± 0.06 <sup>b</sup> | 3.93 | ± 0.11 <sup>c</sup> | 2.40 ± 0.05 <sup>†</sup>  | 2.98 ± 0.02 <sup>††</sup> |
| SR50lr | 6.92 | ± 0.06 <sup>a</sup> | 5.60 | ± 0.05 <sup>a</sup> | 4.15 | ± 0.02 <sup>b</sup> | 1.32 ± 0.05 <sup>**</sup> | 2.77 ± 0.04 <sup>†</sup>  |
| SR50bb | 6.93 | ± 0.09 <sup>a</sup> | 6.85 | ± 0.02 <sup>a</sup> | 4.15 | ± 0.09 <sup>b</sup> | 0.09 ± 0.05 <sup>*</sup>  | 2.79 ± 0.06 <sup>†</sup>  |
| SR50m1 | 6.97 | ± 0.14 <sup>a</sup> | 5.95 | ± 0.02 <sup>a</sup> | 3.87 | ± 0.13 <sup>c</sup> | 1.02 ± 0.08 <sup>**</sup> | 3.10 ± 0.09 <sup>††</sup> |
| SR50bl | 6.98 | ± 0.23 <sup>a</sup> | 5.05 | ± 0.03 <sup>b</sup> | 3.67 | ± 0.11 <sup>c</sup> | 1.93 ± 0.13 <sup>†</sup>  | 3.31 ± 0.12 <sup>††</sup> |
| SR50m2 | 6.97 | ± 0.17 <sup>a</sup> | 5.32 | ± 0.02 <sup>b</sup> | 3.74 | ± 0.32 <sup>c</sup> | 1.65 ± 0.10 <sup>**</sup> | 3.23 ± 0.09 <sup>††</sup> |
| SR75lh | 6.89 | ± 0.12 <sup>a</sup> | 4.64 | ± 0.01 <sup>b</sup> | 3.97 | ± 0.08 <sup>c</sup> | 2.25 ± 0.07 <sup>†</sup>  | 2.92 ± 0.06 <sup>†</sup>  |
| SR75lr | 6.95 | ± 0.13 <sup>a</sup> | 5.77 | ± 0.28 <sup>a</sup> | 4.39 | ± 0.03 <sup>b</sup> | 1.18 ± 0.21 <sup>**</sup> | 2.56 ± 0.08 <sup>†</sup>  |
| SR75bb | 6.93 | ± 0.05 <sup>a</sup> | 6.91 | ± 0.07 <sup>a</sup> | 4.37 | ± 0.09 <sup>b</sup> | 0.02 ± 0.06 <sup>*</sup>  | 2.56 ± 0.03 <sup>†</sup>  |
| SR75m1 | 6.93 | ± 0.09 <sup>a</sup> | 6.11 | ± 0.16 <sup>a</sup> | 3.90 | ± 0.11 <sup>c</sup> | 0.82 ± 0.12 <sup>**</sup> | 3.03 ± 0.05 <sup>††</sup> |
| SR75bl | 6.94 | ± 0.14 <sup>a</sup> | 5.32 | ± 0.11 <sup>b</sup> | 3.84 | ± 0.08 <sup>c</sup> | 1.62 ± 0.12 <sup>**</sup> | 3.10 ± 0.07 <sup>††</sup> |
| SR75m2 | 6.99 | ± 0.11 <sup>a</sup> | 5.68 | ± 0.09 <sup>a</sup> | 3.82 | ± 0.02 <sup>c</sup> | 1.31 ± 0.10 <sup>**</sup> | 3.16 ± 0.06 <sup>††</sup> |

Different letters (for time points values) or symbols (for delta values) indicate significant differences by Tukey's HSD (honestly significant difference) test ( $P < 0.05$ ).
