# Supplementary figures and images for: Volatilome changes during probiotic fermentation of combined soy and rice drinks
Source: Royal Society of Chemistry journal article supplement (doi:10.1039/d0fo03337e), 2021-01-01

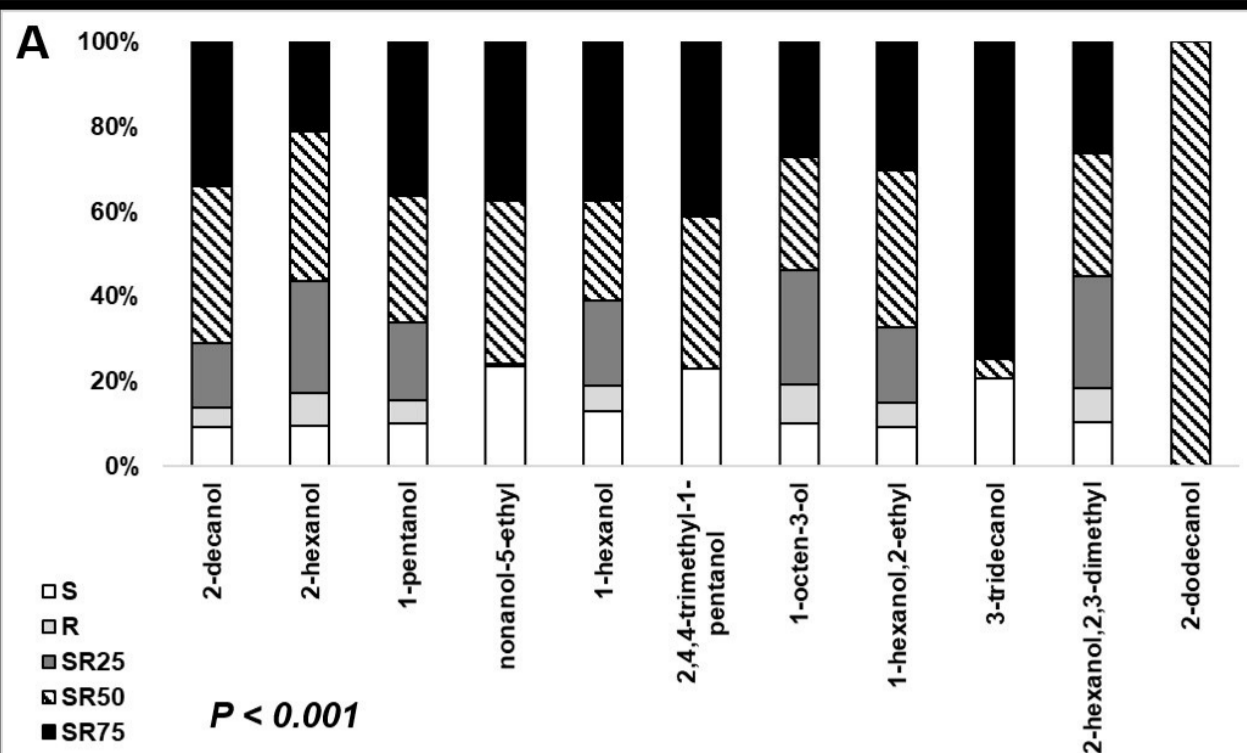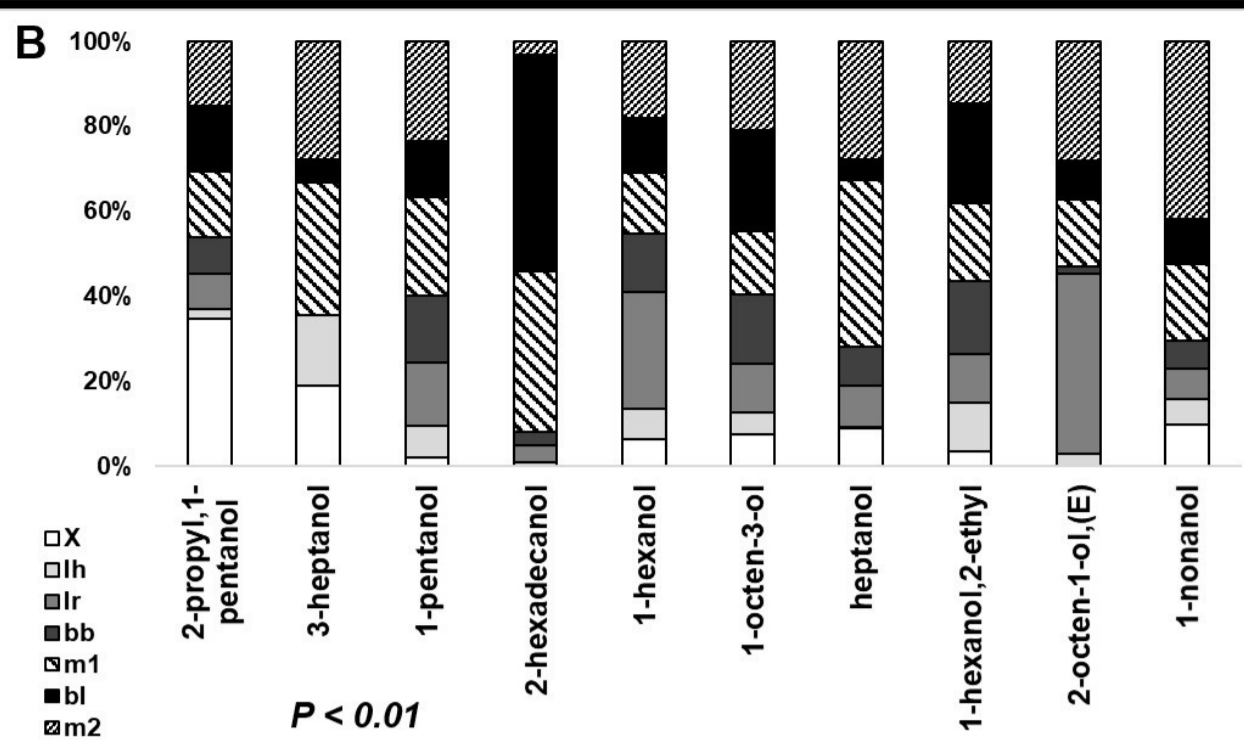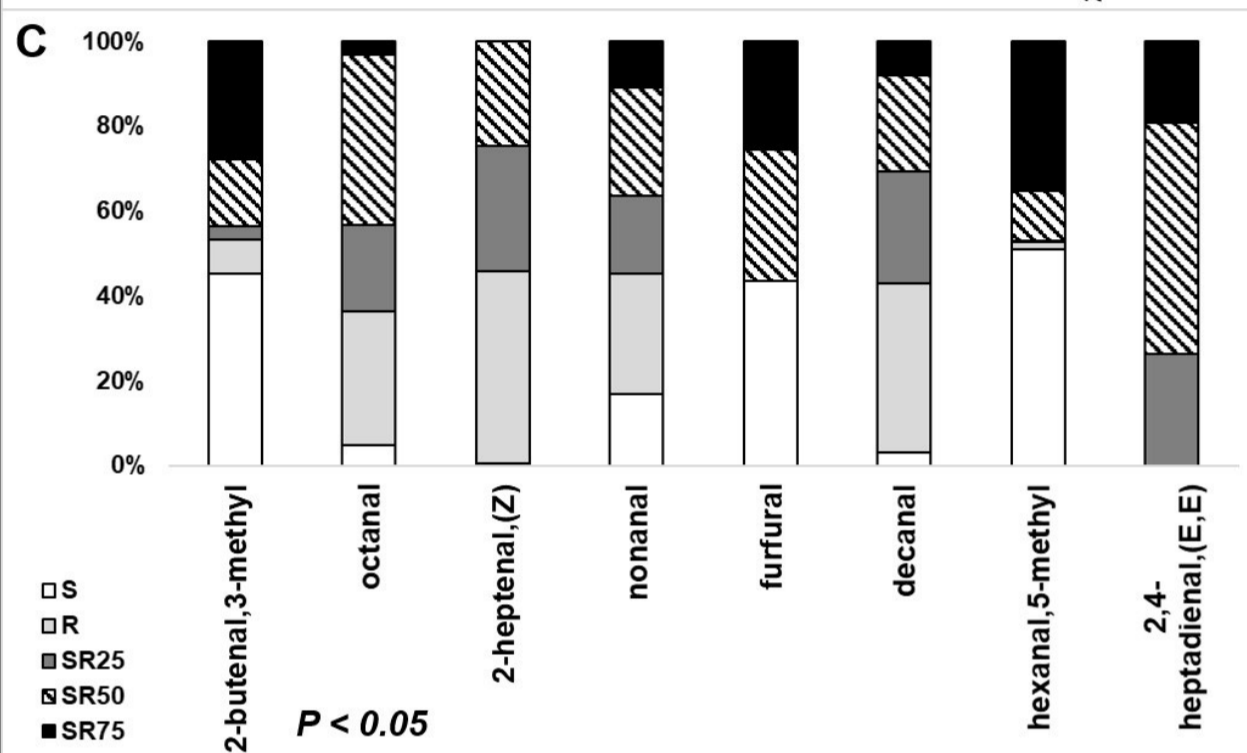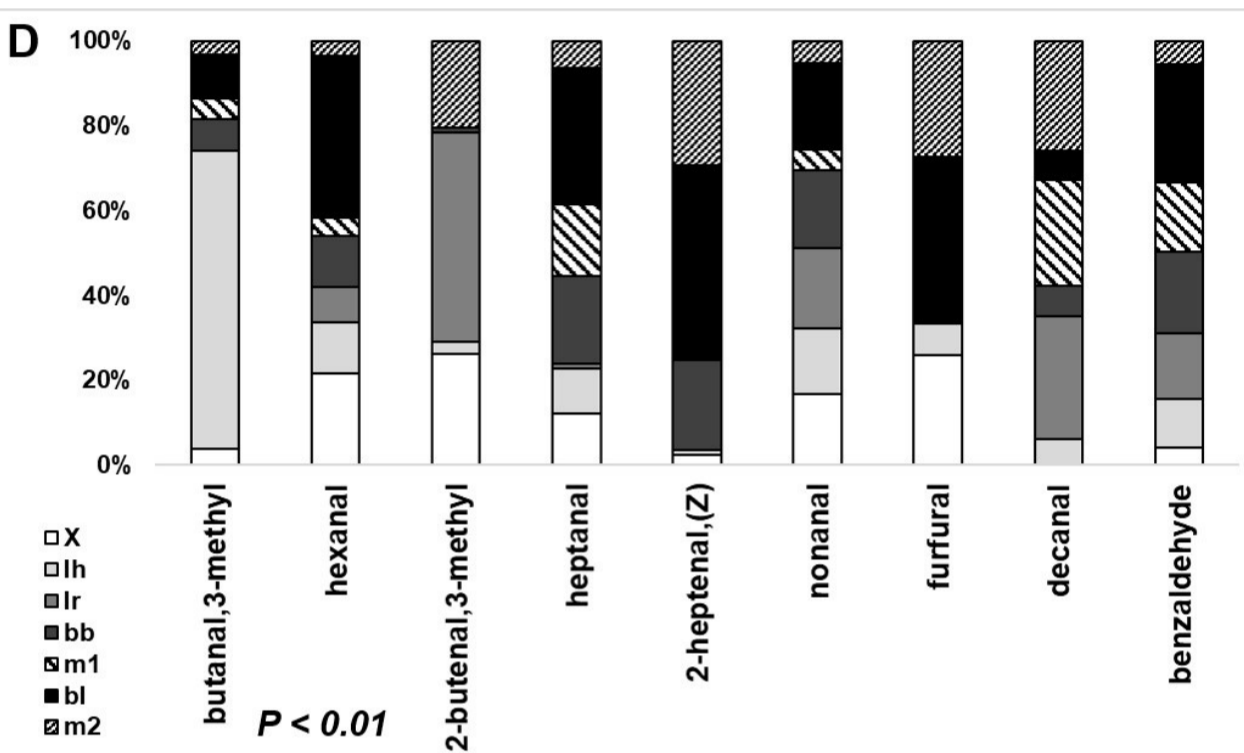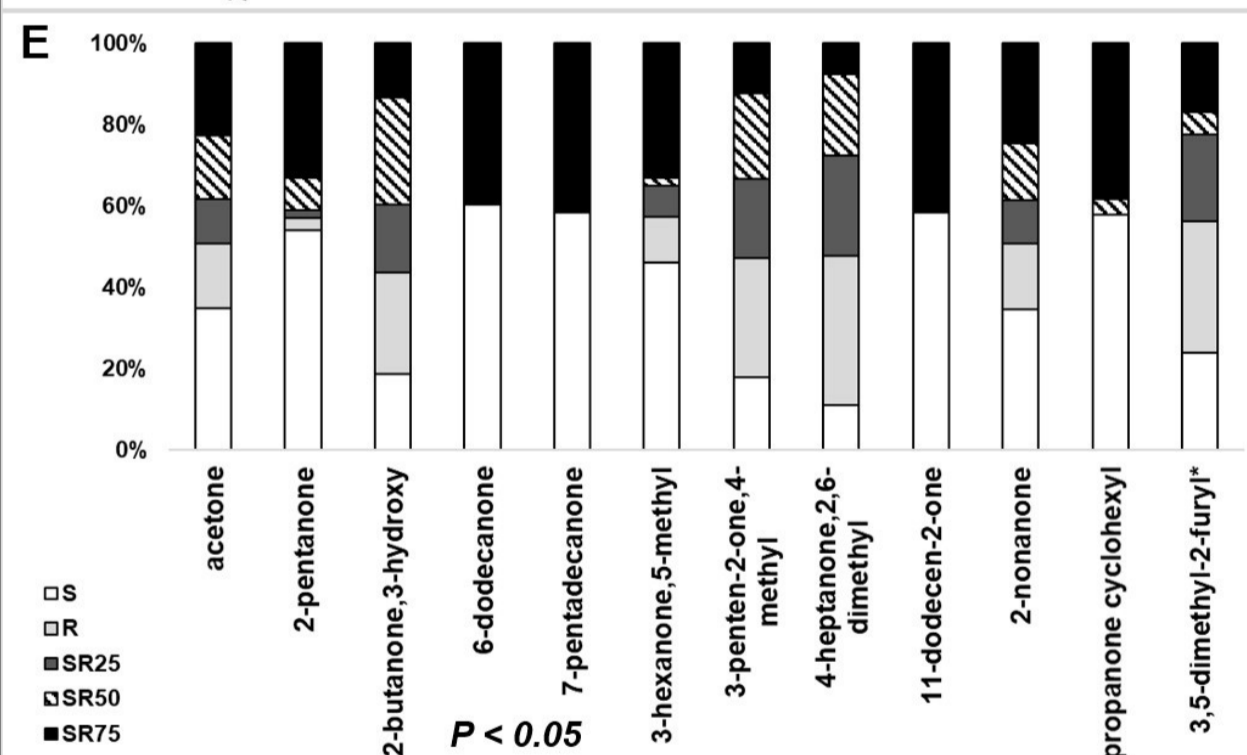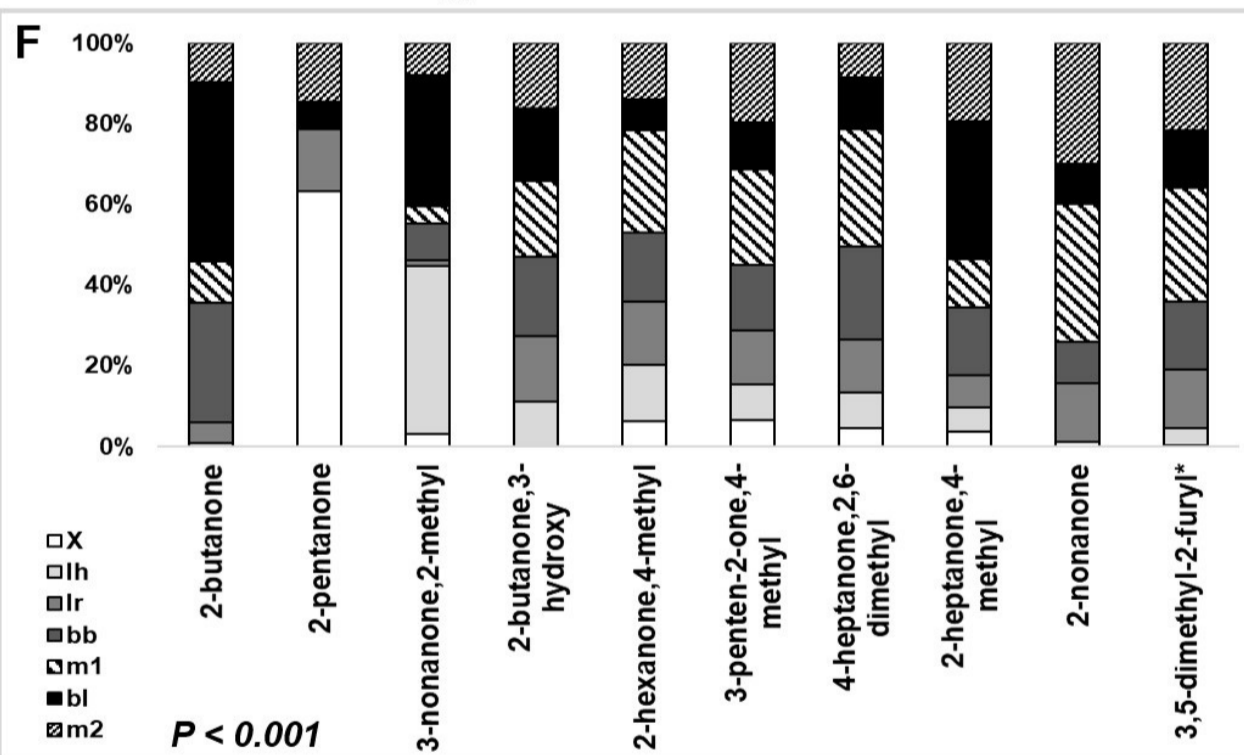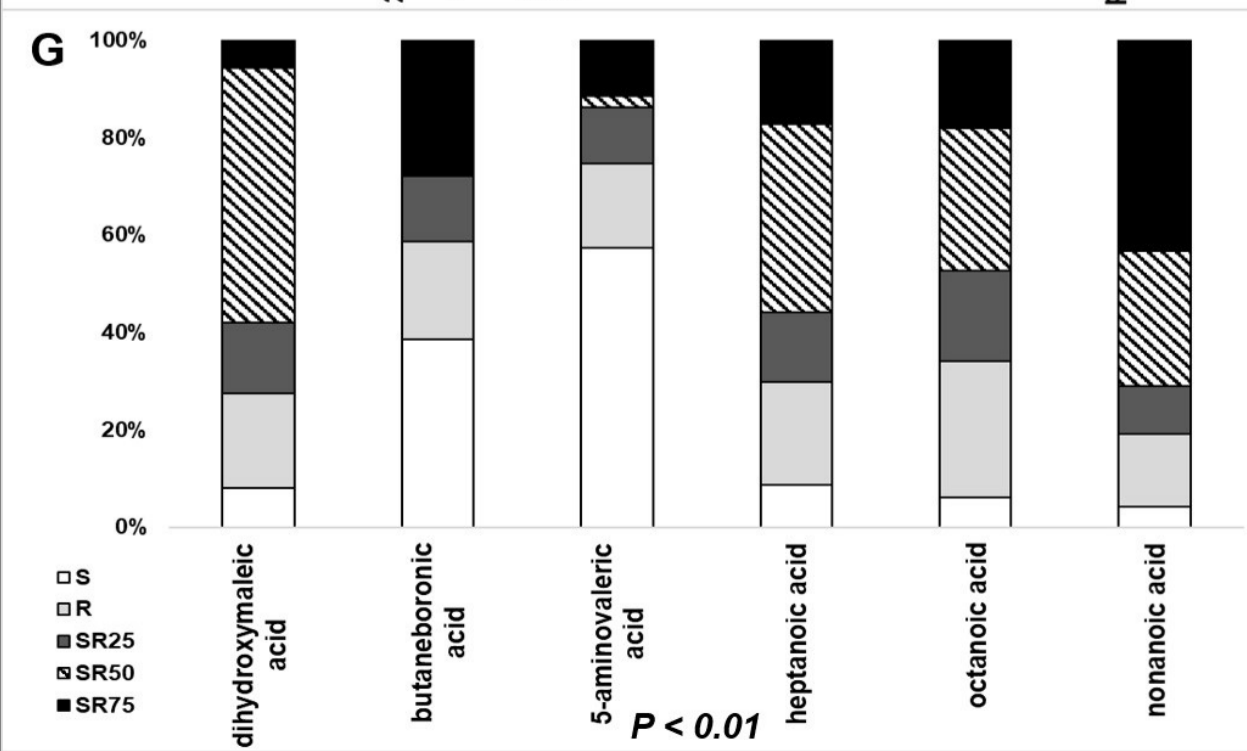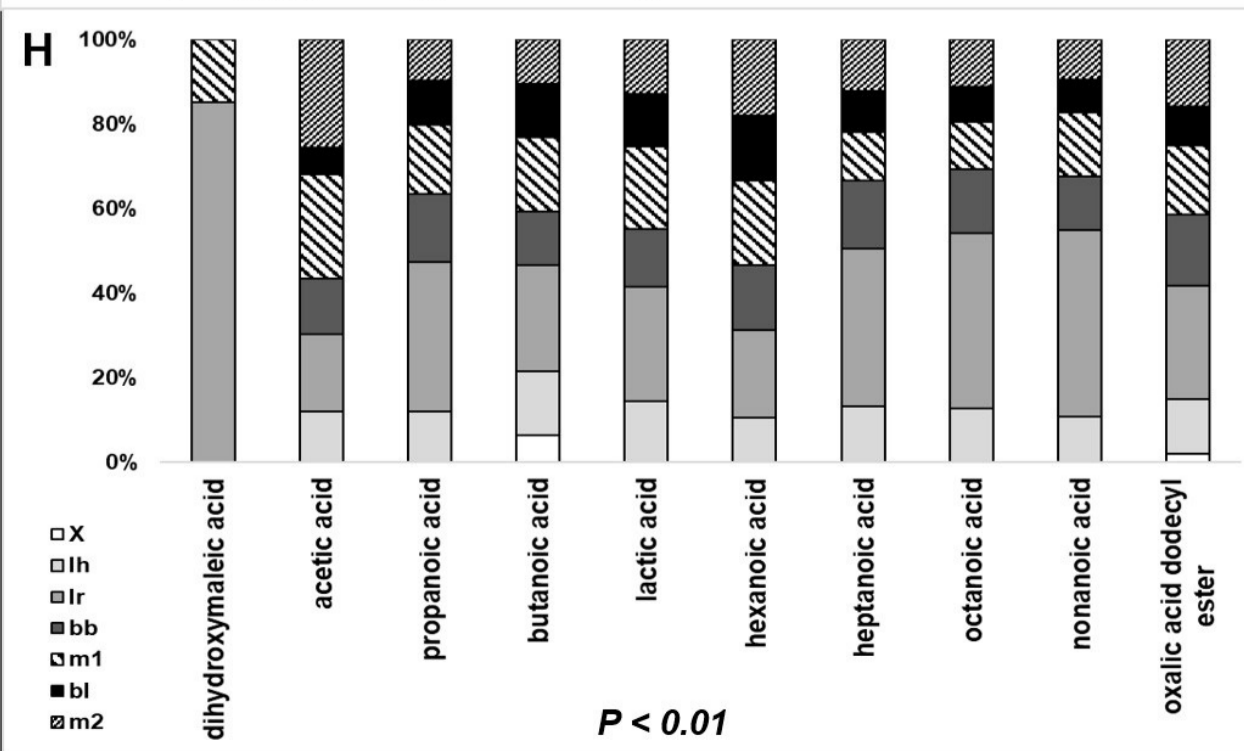

Supplement: d0fo03337e5.pdf [file d0fo03337e5.pdf]
